# Supplementary material for: Yeast Two-Hybrid Screen Identifies PKA-Riα Interacting Proteins during Mouse Spermiogenesis
Source: MDPI journal article supplement (doi:10.3390/genes12121941), 2021-11-30
Supplement: s1 [file s1]

Supplementary Table-S1

| Supplementary Table-S1: List of primers used.                                                    |  |                                                     |  |  |  |  |  |  |  |  |
|--------------------------------------------------------------------------------------------------|--|-----------------------------------------------------|--|--|--|--|--|--|--|--|
| Primers fo construction of cDNA library                                                          |  |                                                     |  |  |  |  |  |  |  |  |
| SMART III Oligo                                                                                  |  | 5'-AAGCAGTGGTATCAACGCAGAGTGGCCATTATGGCCGGG-3'       |  |  |  |  |  |  |  |  |
| CDSIII primer                                                                                    |  | 5'-ATTCTAGAGGCCGAGGCGGCCGACATG-d (T) 30 VN-3'       |  |  |  |  |  |  |  |  |
| CDSIII/6 primer                                                                                  |  | 5'-ATTCTAGAGGCCGAGGCGGCCGACATG-NNNNNN-3'            |  |  |  |  |  |  |  |  |
| Primers for cDNA library amplification                                                           |  |                                                     |  |  |  |  |  |  |  |  |
| 5'-PCR Primer                                                                                    |  | 5'-TTCCACCCAAGCAGTGGTATCAACGCAGAGTGG-3'             |  |  |  |  |  |  |  |  |
| 3'-PCR Primer                                                                                    |  | 5'-GTATCGATGCCCCACCCTCTAGAGGCCGAGGGCGGCCGACA-3'     |  |  |  |  |  |  |  |  |
| Primers for cDNA of Prkar1α (Underlined: Ned1 and BamHI sites)                                   |  |                                                     |  |  |  |  |  |  |  |  |
| X144F                                                                                            |  | 5'-GGAATTCCATATGATGGCGTCTGGCAGTATGGC-3'             |  |  |  |  |  |  |  |  |
| X144R                                                                                            |  | 5'-CGGGATCCTCAGACGGACAGGGACACGAAGC-3'               |  |  |  |  |  |  |  |  |
| Primers for identification of plasmids in yeast                                                  |  |                                                     |  |  |  |  |  |  |  |  |
| 5'-AD LD insert primer                                                                           |  | 5'-CTATTGATGATGAAGATACCCCAACAAACCC-3'               |  |  |  |  |  |  |  |  |
| 3'AD LD insert primer                                                                            |  | 5'-GTGAACTTGCGGGGTTTTTCAGTATCTACGATT-3'             |  |  |  |  |  |  |  |  |
| Primers for PCR of partial cDNAs for homologous recombination in yeast                           |  |                                                     |  |  |  |  |  |  |  |  |
| 5'-LD insert primer                                                                              |  | 5'-GGAGTACCCATACGAGCTACC-3'                         |  |  |  |  |  |  |  |  |
| 3'-LD insert primer                                                                              |  | 5'-TATCTACGATTCACTGTCAGC-3'                         |  |  |  |  |  |  |  |  |
| Primers for RT-PCR of full-length cDNAs (Underlined: homologous arms for recombination in yeast) |  |                                                     |  |  |  |  |  |  |  |  |
| Vdac2 (888 bp)                                                                                   |  |                                                     |  |  |  |  |  |  |  |  |
| X5F                                                                                              |  | 5'-ACGACGTACCAGATTACGCTATGGCTGAGTGCTGTGTACCGGT-3'   |  |  |  |  |  |  |  |  |
| X5R                                                                                              |  | 5'-TATCTACGATTCACTGCAAGTTAAGCCTCCAATCCAAG-3'        |  |  |  |  |  |  |  |  |
| Mzt12 (480 bp)                                                                                   |  |                                                     |  |  |  |  |  |  |  |  |
| X12F                                                                                             |  | 5'-ACGACGTACCAGATTACGCTATGGCGCGCGCGCGGCTGCTGCT-3'   |  |  |  |  |  |  |  |  |
| X12R                                                                                             |  | 5'-TATCTACGATTCACTGCAAGTTATGGCTGCTTCGGGAGTTGCTT-3'  |  |  |  |  |  |  |  |  |
| Clba1 (966 bp)                                                                                   |  |                                                     |  |  |  |  |  |  |  |  |
| X14F                                                                                             |  | 5'-ACGACGTACCAGATTACGCTATGCAAGCGGGCAGGAGGT-3'       |  |  |  |  |  |  |  |  |
| X14R                                                                                             |  | 5'-TATCTACGATTCACTGCAAGTTAGCAGACATCATTATTAAGAAT-3'  |  |  |  |  |  |  |  |  |
| Oaz3 (733 bp)                                                                                    |  |                                                     |  |  |  |  |  |  |  |  |
| X15F                                                                                             |  | 5'-ACGACGTACCAGATTACGCTCTGCCTTGTAACAGGTCCCGC-3'     |  |  |  |  |  |  |  |  |
| X15R                                                                                             |  | 5'-TATCTACGATTCACTGCAAGTCACTGGCCAGGGTGGC-3'         |  |  |  |  |  |  |  |  |
| Spat24 (588 bp)                                                                                  |  |                                                     |  |  |  |  |  |  |  |  |
| X20F                                                                                             |  | 5'-ACGACGTACCAGATTACGCTATGGCGACGCCCTTG-3'           |  |  |  |  |  |  |  |  |
| X20R                                                                                             |  | 5'-TATCTACGATTCACTGCAAGTCAATTCGTGACCTGCCT-3'        |  |  |  |  |  |  |  |  |
| Actg1 (733 bp)                                                                                   |  |                                                     |  |  |  |  |  |  |  |  |
| X23F                                                                                             |  | 5'-ACGACGTACCAGATTACGCTATGTTTGAACCTTCAATACCCAG-3'   |  |  |  |  |  |  |  |  |
| X23R                                                                                             |  | 5'-TATCTACGATTCACTGCAAGCTAGAAGCATTTCCGGTGGACG-3'    |  |  |  |  |  |  |  |  |
| Ankef1 (2328 bp)                                                                                 |  |                                                     |  |  |  |  |  |  |  |  |
| X31F                                                                                             |  | 5'-ACGACGTACCAGATTACGCTATGGCTTTGGCAGACAAGAGACT-3'   |  |  |  |  |  |  |  |  |
| X31R                                                                                             |  | 5'-TATCTACGATTCACTGCAAGTTAGTTCTTGAGTGTTCCTCCAGT-3'  |  |  |  |  |  |  |  |  |
| Ppp1r42 (1074 bp)                                                                                |  |                                                     |  |  |  |  |  |  |  |  |
| X34F                                                                                             |  | 5'-ACGACGTACCAGATTACGCTATGGTTCGACTGACGGTGGAT-3'     |  |  |  |  |  |  |  |  |
| X34R                                                                                             |  | 5'-TATCTACGATTCACTGCAAGTTACTCCTTTTTCTCAGAC-3'       |  |  |  |  |  |  |  |  |
| Spat3 (513 bp)                                                                                   |  |                                                     |  |  |  |  |  |  |  |  |
| X35F                                                                                             |  | 5'-ACGACGTACCAGATTACGCTATGAAGAAGGTCAAAAAGAAAAAGT-3' |  |  |  |  |  |  |  |  |
| X35R                                                                                             |  | 5'-TATCTACGATTCACTGCAAGCTACACCAAGGCTTTTAGC-3'       |  |  |  |  |  |  |  |  |
| Odf1 (747 bp)                                                                                    |  |                                                     |  |  |  |  |  |  |  |  |
| X38F                                                                                             |  | 5'-ACGACGTACCAGATTACGCTATGGCCGCACTGAGTTGTCT-3'      |  |  |  |  |  |  |  |  |
| X38R                                                                                             |  | 5'-TATCTACGATTCACTGCAAGTTATAAGATCATCTTCCTACAG-3'    |  |  |  |  |  |  |  |  |
| Morn2 (240 bp)                                                                                   |  |                                                     |  |  |  |  |  |  |  |  |
| X51F                                                                                             |  | 5'-ACGACGTACCAGATTACGCTATGAATGGCTTTGGAAGACTTG-3'    |  |  |  |  |  |  |  |  |
| X51R                                                                                             |  | 5'-TATCTACGATTCACTGCAAGCTACATGTAGAGCTTTAGTTTCAGG-3' |  |  |  |  |  |  |  |  |
| Atp1b3 (843 bp)                                                                                  |  |                                                     |  |  |  |  |  |  |  |  |
| X46F                                                                                             |  | 5'-ACGACGTACCAGATTACGCTACGAAGACTGAGAAAAATCCT-3'     |  |  |  |  |  |  |  |  |
| X46R                                                                                             |  | 5'-TATCTACGATTAATCTGCAAGGCTCGTGTGTGACTTTGAAC-3'     |  |  |  |  |  |  |  |  |
| Primers for RT-PCR of partial cDNAs encoding N- and C-terminal MENA fragments                    |  |                                                     |  |  |  |  |  |  |  |  |
| Mena-1-F                                                                                         |  | 5'-ACGACGTACCAGATTACGCTAGTGAACAGAGTATCTGTCAGGC-3'   |  |  |  |  |  |  |  |  |
| Mena-1-R                                                                                         |  | 5'-TATCTACGATTCACTGCAAGTCTGCGCTCTCGCTCCCACTC-3'     |  |  |  |  |  |  |  |  |
| Mena-2-F                                                                                         |  | 5'-ACGACGTACCAGATTACGCTGCATCTGGAATTTTCTCTGGATC-3'   |  |  |  |  |  |  |  |  |
| Mena-2-R                                                                                         |  | 5'-TATCTACGATACATCTGCAAGTGCAGTGTTCAGTCTGCTCAGC-3'   |  |  |  |  |  |  |  |  |

Supplementary Table-S2

| Supplementary Table-S2: List of genes identified to interact with PKA-R1a. |                                                                         |                       |                |                |                      |                     |                                                                                                         |
|----------------------------------------------------------------------------|-------------------------------------------------------------------------|-----------------------|----------------|----------------|----------------------|---------------------|---------------------------------------------------------------------------------------------------------|
| Gene Symbol                                                                | Gene Name                                                               | NCBI Accession Number | Protein ID     | Protein Length | cDNA clone in pGADT7 | Polypeptide encoded | Fncional Roles                                                                                          |
| Actg1                                                                      | Actin, gamma, cytoplasmic 1                                             | NM_009609.3           | NP_033739.1    | 375 aa         | Full-length/Partial  | aa224-375           | Ubiquitous<br>Actin cytoskeletal component                                                              |
| Adam32                                                                     | A disintegrin and metallopeptidase domain 32                            | NM_153397.2           | NP_700446.2    | 754 aa         | Partial              | aa644-754           | Testis-specific<br>Sperm development and fertilization                                                  |
| Ankf1                                                                      | Ankyrin repeat and EF-hand domain containing 1                          | NM_175667.4           | NP_783598.1    | 775 aa         | Full-length          | aa1-754             | Testis-specific<br>Enriched in ciliated tissue and cells, testis                                        |
| Atp1b3                                                                     | ATPase, Na+/K+ transporting, beta 3 polypeptide                         | NM_007502.5           | NP_031528.1    | 276 aa         | Full-length          | aa1-700             | Testis-enriched<br>Nociceptive sensitivity                                                              |
| BC051142                                                                   | Testis-expressed basic protein 1 isoform 1                              | NM_001001177.2        | NP_001001177   | 393 aa         | Partial              | aa223-363           | Testis-specific<br>N/A                                                                                  |
| Ciba1                                                                      | Clathrin binding box of aftriphilin containing 1                        | NM_145450.3           | NP_663425.2    | 321 aa         | Full-length          | aa1-321             | Testis-enriched<br>N/A                                                                                  |
| Dnaja4                                                                     | DnaJ heat shock protein family (Hsp40) member A4                        | NM_001357875.1        | NP_001344804.1 | 462 aa         | Partial              | aa199-426           | Testis-enriched<br>Cholesterol synthesis                                                                |
| Dnaja4                                                                     | DnaJ heat shock protein family (Hsp40) member C4                        | NM_001356999.1        | NP_001343928.1 | 261 aa         | Partial              | aa17-261            | Testis-enriched<br>N/A                                                                                  |
| Dync1h1                                                                    | Dynein cytoplasmic 1 heavy chain 1                                      | NM_030238.2           | NP_084514.2    | 4644 aa        | Partial              | aa4501-4644         | Ubiquitous<br>Retrograde transport, dendritic morphology,                                               |
| Mena                                                                       | Mammalian ENA/VASP actin regulator (Enah) homolog, transcript variant 4 | NM_001083121.2        | NP_001076590   | 541 aa         | Partial, partial     | aa1-253, aa344-541  | Ubiquitous<br>Actin cytoskeleton remodeling and cell polarity                                           |
| Ing1                                                                       | Inhibitor of growth family, member 1                                    | NM_011919.5           | NP_036049.2    | 279 aa         | Partial              | N/A                 | Ubiquitous<br>Inhibits p53-dependent transcription activation                                           |
| Mett16                                                                     | Methyltransferase like 16                                               | NM_026197.3           | NP_080473.1    | 553 aa         | Partial              | aa468-553           | Ubiquitous<br>Methylates N6-adenosine of mRNAs and U6 snRNAs                                            |
| Morn2                                                                      | MORN repeat containing 2                                                | NM_001360440.1        | NP_001347369.1 | 79 aa          | Full-length          | aa1-79              | Testis-specific<br>Membrane occupation and recognition nexus repeat-containing-2                        |
| Mzt2                                                                       | Mitotic spindle organizing protein 2                                    | NM_001359003.1        | NP_001345932.1 | 159 aa         | Full-length          | aa1-159             | Testis-enriched<br>Gamma-tubulin ring complex associated Mozart2 family member                          |
| Oaz3                                                                       | Ornithine decarboxylase antizyme 3                                      | NM_016901.3           | NP_058597.2    | 243 aa         | Full-length          | aa1-243             | Testis-specific<br>Inhibits ornithine decarboxylase (ODC) sperm connecting piece development            |
| Odf1                                                                       | Outer dense fiber of sperm tails 1                                      | NM_008757.3           | NP_032783.2    | 248 aa         | Full-length          | aa1-248             | Testis-specific<br>HSPB10, mitochondrial sheath and ODF organization, head-tail linkage, motility       |
| Picd4                                                                      | Phospholipase C, delta 4                                                | NM_001081456.1        | NP_001074925.1 | 775 aa         | Partial              | aa597-775           | Testis-specific<br>Hydrolyzes PIP2 to generate DAG and IP3, acrosome reaction                           |
| Ppp1r42                                                                    | Protein phosphatase 1, regulatory subunit 42                            | NM_145692.2           | NP_663730.1    | 357 aa         | Full-length/Partial  | aa1-357             | Testis-specific<br>Positively regulates protein phosphatase 1 (PP1) in the testis, centrosome dynamics  |
| Prmt7                                                                      | Protein arginine N-methyltransferase 7                                  | NM_145404.1           | NP_663379.1    | 692 aa         | Partial              | aa598-692           | Testis-enriched<br>catalyzes ω-monomethylarginine and symmetric-dimethylarginine formation              |
| Rps15a                                                                     | Ribosomal protein S15A                                                  | NM_170669.2           | NP_733769.1    | 130 aa         | Partial              | aa86-130            | Ubiquitous<br>uRPS8, component of ribosomal small subunit, positively regulate cell proliferation       |
| Smcp                                                                       | Sperm mitochondria-associated cysteine-rich protein                     | NM_008574.4           | NP_032600.3    | 143 aa         | Partial              | aa120-143           | Testis-specific<br>Mitochondrial capsule associated, motility regulation                                |
| Spata21                                                                    | Spermatogenesis associated 21                                           | NM_177867.3           | NP_808535.1    | 681 aa         | Partial              | aa621-681           | Testis-specific<br>EF hand containing, may be involved in differentiation of haploid spermatids         |
| Spata24                                                                    | Spermatogenesis associated 24                                           | NM_027733.5           | NP_082009.3    | 185 aa         | Full-length/Partial  | aa1-155             | Testis-specific<br>DNA binding, may be involved in cytoplasm movement and removal during spermiogenesis |
| Spata3                                                                     | Spermatogenesis associated 3                                            | NM_027300.3           | NP_081576.2    | 193 aa         | Full-length/Partial  | aa1-159             | Testis-specific<br>N/A                                                                                  |
| Tulp2                                                                      | Tubby-like protein 2                                                    | NM_008807.3           | NP_032833.2    | 562 aa         | Partial              | aa398-562           | Testis-specific<br>C-terminal TUB domain, stress response, TF, PI binding, GPCR and Shh signaling       |
| Ubc                                                                        | Ubiquitin C                                                             | NM_019639.4           | NP_062613.3    | 734 aa         | Partial              | aa649-734           | Ubiquitous<br>Protein ubiquitilation                                                                    |
| Vdac2                                                                      | Voltage-dependent anion channel 2                                       | NM_011695.2           | NP_035825.1    | 295 aa         | Full-length          | aa1-295             | Testis-enriched<br>Outer mitochondrial membrane ion channel, has both anion and cation seletivity       |
